# Supplementary material for: Cereal and Pulse Crops with Improved Resistance to Pratylenchus thornei Are Needed to Maximize Wheat Production and Expand Crop Sequence Options
Source: MDPI journal article supplement (doi:10.3390/agronomy12030573), 2022-02-25
Supplement: s1 [file s1]

# Cereal and pulse crops with improved resistance to *Pratylenchus thornei* are needed to maximize wheat production and expand crop sequence options

Kirsty Owen <sup>1\*</sup>, Timothy Clewett <sup>1,2</sup>, Kerry Bell <sup>3</sup> and John Thompson <sup>1</sup>

<sup>1</sup> Centre for Crop Health, Institute for Agriculture and the Environment, University of Southern Queensland, Toowoomba, QLD, 4350 Australia; tim@clewett.net.au (T.G.C.); john.thompson@usq.edu.au (J.P.T.)

<sup>2</sup> (Retired) University of Southern Centre for Crop Health, Institute for Agriculture and the Environment, University of Southern Queensland, Toowoomba, QLD, 4350, Australia.

<sup>3</sup> Leslie Research Facility, Department of Agriculture and Fisheries Queensland, Toowoomba, QLD, 4350. Australia; kerry.bell@daf.qld.gov.au

\* Correspondence: Kirsty.Owen@usq.edu.au

**Abstract:** In the subtropical grain region of eastern Australia, two experiments were conducted, one initially with 2490 *P. thornei*/kg soil, the other with 8150 *P. thornei*/kg soil at 0–0.9 m soil depth. We determined the effects of *P. thornei*, residual from a weed-free fallow and pre-cropping with several cultivars each of barley (*Hordeum vulgare*), faba bean (*Vicia faba*), chickpea (*Cicer arietinum*) and wheat (*Triticum aestivum*) (Phase 1), on the growth of wheat cultivars with intolerance or tolerance to *P. thornei* (Phase 2). *Pratylenchus thornei* substantially increased after growing all cultivars of the Phase 1 faba bean, barley and most cultivars of chickpea and wheat, and decreased after two moderately-resistant wheat cultivars and the fallow treatment. The biomass of the Phase 2 tolerant cultivar ranged from 5070 to 6780 kg/ha and the intolerant cultivar, 1020 to 4740 kg/ha. There was a negative linear relationship between *P. thornei* population densities and biomass of the Phase 2 intolerant cultivar but not of the tolerant cultivar. Growers are at risk of financial loss because they are restricted in their choice of crops to reduce damaging population densities of *P. thornei*. The development of resistant and tolerant crop genotypes can maximize production in *P. thornei* affected farming systems.

**Keywords:** *Triticum aestivum*, chickpea, barley, faba bean, weed-free fallow, root-lesion nematode

---

## 1. Supplementary Material

**Supplementary Table S1.** Nematode populations and available water content (AWC, mm) at each depth interval sampled, one-month before sowing Phase 1 treatments in each experiment. Nematode data were transformed by  $\ln(x+500)$  for Experiments 1 and 2. Numbers in parentheses are back-transformed means; SE, standard error of the mean;  $n=9$  for each depth interval in each experiment.

|              | Soil depth (m) | Nematodes/kg soil           |      |                            |      |                       |      | AWC (mm) | SE   |
|--------------|----------------|-----------------------------|------|----------------------------|------|-----------------------|------|----------|------|
|              |                | <i>Pratylenchus thornei</i> | SE   | <i>Merlinius brevidens</i> | SE   | Free-living nematodes | SE   |          |      |
| Experiment 1 | 0–0.15         | 7.23 (10850)                | 0.13 | 6.28 (32)                  | 0.09 | 7.51 (1330)           | 0.12 | 4.3      | 1.33 |
|              | 0.15–0.30      | 8.10 (11952)                | 0.13 | 6.29 (39)                  | 0.09 | 7.88 (2143)           | 0.12 | 18.8     | 1.33 |
|              | 0.30–0.45      | 8.12 (9139)                 | 0.13 | 6.60 (237)                 | 0.09 | 7.53 (1371)           | 0.12 | 21.0     | 1.33 |
|              | 0.45–0.60      | 8.31 (6777)                 | 0.13 | 6.49 (159)                 | 0.09 | 7.62 (1536)           | 0.12 | 43.1     | 1.33 |
|              | 0.60–0.90      | 7.98 (5164)                 | 0.13 | 6.91 (499)                 | 0.09 | 7.69 (1688)           | 0.12 | 36.9     | 1.33 |
|              | lsd $P=0.05$   | 0.51                        |      | 0.34                       |      | 0.47                  |      | 4.8      |      |
| Experiment 2 | 0–0.15         | 8.34 (880)                  | 0.13 | 6.72 (325)                 | 0.09 | 8.30 (3505)           | 0.12 | 11.2     | 1.98 |
|              | 0.15–0.30      | 9.43 (2804)                 | 0.13 | 6.67 (289)                 | 0.09 | 7.74 (1789)           | 0.12 | 20.0     | 1.40 |
|              | 0.30–0.45      | 9.17 (2851)                 | 0.13 | 6.60 (235)                 | 0.09 | 7.64 (1588)           | 0.12 | 19.7     | 1.36 |
|              | 0.45–0.60      | 8.89 (3562)                 | 0.13 | 6.90 (491)                 | 0.09 | 7.59 (1482)           | 0.12 | 18.3     | 1.36 |
|              | 0.60–0.90      | 8.65 (2422)                 | 0.13 | 6.94 (531)                 | 0.09 | 7.28 (953)            | 0.12 | 27.3     | 1.33 |
|              | lsd $P=0.05$   | 0.51                        |      | 0.34                       |      | 0.47                  |      | 4.8      |      |

**Supplementary Table S2.** Grain yield (kg/ha) of the Phase 1 winter crop cultivars. For barley, there was a significant effect of experiment x cultivar,  $n=6$ ; for all other crops, there was significant effect of cultivar only,  $n=12$ ; number in parentheses is average standard error of difference.

| Crop      | Cultivar        | Grain yield (kg/ha) |              |
|-----------|-----------------|---------------------|--------------|
|           |                 | Experiment 1        | Experiment 2 |
| Barley    | Commander       | 3189                | 2981         |
|           | Gairdner        | 3458                | 2533         |
|           | Grimmett        | 3131                | 2771         |
|           | Grout           | 3417                | 2856         |
|           | ND-19119-05     | 3272                | 3090         |
|           | Hindmarsh       | 2339                | 2131         |
|           | l.s.d. $P=0.05$ | 340 (170)           |              |
|           |                 | Mean of Experiments |              |
| Chickpea  | Amethyst        | 1952                |              |
|           | Tyson           | 1979                |              |
|           | Yorker          | 2200                |              |
|           | PBA HatTrick    | 2261                |              |
|           | Sona            | 2323                |              |
|           | Gully           | 2349                |              |
|           | l.s.d. $P=0.05$ | 259 (182)           |              |
| Faba bean | Ascot           | 321                 |              |
|           | Rossa           | 713                 |              |
|           | Cairo           | 969                 |              |
|           | Fiesta          | 993                 |              |
|           | AF03109         | 1131                |              |
|           | Doza            | 1141                |              |
|           | l.s.d. $P=0.05$ | 144 (101)           |              |
| Wheat     | Petrie          | 2356                |              |
|           | Kennedy         | 3045                |              |
|           | GS50a           | 3149                |              |
|           | EGA Wylie       | 3873                |              |
|           | QT9050          | 3909                |              |
|           | l.s.d. $P=0.05$ | 314 (220)           |              |

**Supplementary Table S3.** Standard error of the mean (SE) for each data point plotted in Figure 1. *Pratylenchus thornei*/kg soil to 0.9 m soil depth 6 months after harvest of the Phase 1 crops (2 months prior to sowing the Phase 2 wheat) for cultivars of (a) barley, (b) chickpea, (c) faba bean and (d) wheat; with the weed-free fallow treatment shown in each figure as a broken line. Means from analysis across the two experiments are presented. Points are plotted on the transformed scale with the back-transformed means indicated on the horizontal axis. Bar markers, l.s.d. ( $P=0.05$ ) for each soil depth x first year cultivar,  $n=12$  for each Phase 1 treatment.

| Crop      | Cultivar     | SE for <i>P. thornei</i> /kg soil at each soil depth |       |       |       |       |
|-----------|--------------|------------------------------------------------------|-------|-------|-------|-------|
|           |              | 0-15                                                 | 15-30 | 30-45 | 45-60 | 60-90 |
| Barley    | Commander    | 0.109                                                | 0.110 | 0.108 | 0.109 | 0.113 |
|           | Gairdner     | 0.114                                                | 0.115 | 0.112 | 0.113 | 0.113 |
|           | Grimmett     | 0.109                                                | 0.110 | 0.108 | 0.109 | 0.117 |
|           | Grout        | 0.109                                                | 0.110 | 0.108 | 0.109 | 0.113 |
|           | ND-19119-05  | 0.109                                                | 0.110 | 0.108 | 0.109 | 0.113 |
|           | Hindmarsh    | 0.109                                                | 0.110 | 0.108 | 0.109 | 0.113 |
| Chickpea  | Amethyst     | 0.109                                                | 0.110 | 0.108 | 0.109 | 0.113 |
|           | Gully        | 0.114                                                | 0.115 | 0.112 | 0.113 | 0.113 |
|           | PBA HatTrick | 0.114                                                | 0.115 | 0.112 | 0.113 | 0.118 |
|           | Sona         | 0.109                                                | 0.110 | 0.108 | 0.109 | 0.113 |
|           | Tyson        | 0.109                                                | 0.110 | 0.108 | 0.112 | 0.113 |
|           | Yorker       | 0.109                                                | 0.110 | 0.108 | 0.109 | 0.113 |
| Faba bean | AF03109      | 0.109                                                | 0.110 | 0.108 | 0.109 | 0.113 |
|           | Ascot        | 0.109                                                | 0.110 | 0.108 | 0.109 | 0.113 |
|           | Cairo        | 0.109                                                | 0.110 | 0.108 | 0.109 | 0.113 |
|           | Doza         | 0.109                                                | 0.110 | 0.108 | 0.109 | 0.113 |
|           | Fiesta       | 0.109                                                | 0.110 | 0.108 | 0.109 | 0.113 |
|           | Rossa        | 0.109                                                | 0.110 | 0.108 | 0.109 | 0.113 |
| Wheat     | EGA Wylie    | 0.109                                                | 0.110 | 0.108 | 0.109 | 0.113 |
|           | GS50a        | 0.109                                                | 0.110 | 0.108 | 0.109 | 0.113 |
|           | Kennedy      | 0.109                                                | 0.110 | 0.108 | 0.109 | 0.113 |
|           | Petrie       | 0.109                                                | 0.110 | 0.108 | 0.109 | 0.113 |
|           | QT9050       | 0.109                                                | 0.110 | 0.108 | 0.109 | 0.113 |
| Fallow    |              | 0.109                                                | 0.110 | 0.108 | 0.109 | 0.113 |

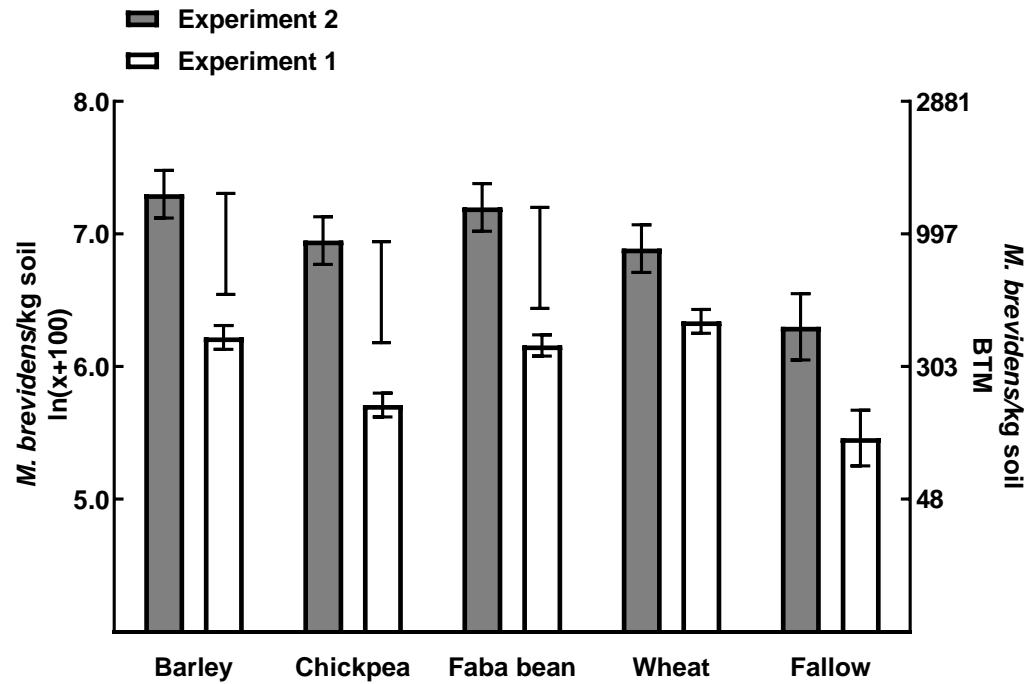

**Supplementary Figure S1.** *Merlinius brevidens*/kg soil at 0–0.9 m soil depth, 6 months after harvest of the Phase 1 treatments (2 months prior to sowing the Phase 2 wheat cultivars). Bar marker above barley, chickpea and faba bean indicates l.s.d. ( $P=0.05$ ) experimental site  $\times$  crop; BTM, back-transformed means; error bar indicates standard error of the mean;  $n=36$  for barley, chickpea and faba bean,  $n=30$  for wheat,  $n=6$  for fallow.
